# Supplementary material
Source: PubMed Central journal article supplement (PMC2933964)

eTable 1. Confidence Intervals and P-values for Testing Null Correlations) Among Spirometry Variables Using CLIC Baseline Data

|                              | FEV <sub>1</sub> % Pred         | FEF <sub>25-75</sub> % Pred     | FEV <sub>1</sub> /FVC % Pred    |
|------------------------------|---------------------------------|---------------------------------|---------------------------------|
| FEV <sub>1</sub> % Pred      |                                 | 0.52 (0.33, 0.66)<br>p < 0.0001 | 0.64 (0.49, 0.75)<br>p < 0.0001 |
| FEF <sub>25-75</sub> % Pred  | 0.64 (0.49, 0.75)<br>p < 0.0001 |                                 | 0.62 (0.46, 0.74)<br>p < 0.0001 |
| FEV <sub>1</sub> /FVC % Pred | 0.52 (0.33, 0.66)<br>p < 0.0001 | 0.62 (0.46, 0.74)<br>p < 0.0001 |                                 |

eTable 2. Confidence Intervals and P-values for Testing Null Correlations) Among Spirometry Variables Using PACT Baseline Data

|                              | FEV <sub>1</sub> % Pred         | FEF <sub>25-75</sub> % Pred     | FEV <sub>1</sub> /FVC % Pred    |
|------------------------------|---------------------------------|---------------------------------|---------------------------------|
| FEV <sub>1</sub> % Pred      |                                 | 0.77 (0.70, 0.83)<br>p < 0.0001 | 0.54 (0.42, 0.64)<br>p < 0.0001 |
| FEF <sub>25-75</sub> % Pred  | 0.77 (0.70, 0.83)<br>p < 0.0001 |                                 | 0.88 (0.85, 0.91)<br>p < 0.0001 |
| FEV <sub>1</sub> /FVC % Pred | 0.54 (0.42, 0.64)<br>p < 0.0001 | 0.88 (0.85, 0.91)<br>p < 0.0001 |                                 |

**eTable 3.** Pearson Correlation and Partial Correlation Coefficients (with 95% Confidence Intervals and P-values for Testing Null Correlations) of Spirometry Variables with Clinical Variables Using CLIC Baseline Data

|                                   | FEV <sub>1</sub> %<br>Predicted<br>Correlations | FEV <sub>1</sub> %<br>Predicted<br>Partial<br>Correlations | FEV <sub>1</sub> %<br>Predicted<br>Partial<br>Correlations<br>(Partially<br>out Clinical<br>Variables) | FEF <sub>25-75</sub> %<br>Predicted<br>Correlations | FEV <sub>25-75</sub> %<br>Predicted<br>Partial<br>Correlations | FEV <sub>1</sub> %<br>Predicted<br>Partial<br>Correlations<br>(Partially<br>out Clinical<br>Variables) | FEV/FVC %<br>Predicted<br>Correlations | FEV/FVC %<br>Predicted<br>Partial<br>Correlations | FEV <sub>1</sub> %<br>Predicted<br>Partial<br>Correlations<br>(Partially<br>out Clinical<br>Variables) |
|-----------------------------------|-------------------------------------------------|------------------------------------------------------------|--------------------------------------------------------------------------------------------------------|-----------------------------------------------------|----------------------------------------------------------------|--------------------------------------------------------------------------------------------------------|----------------------------------------|---------------------------------------------------|--------------------------------------------------------------------------------------------------------|
| <b>Clinical Outcomes</b>          |                                                 |                                                            |                                                                                                        |                                                     |                                                                |                                                                                                        |                                        |                                                   |                                                                                                        |
| Diary Symptoms (Cough and Wheeze) | 0.20 (0.03, 0.36)<br>p = 0.02                   | 0.13 (-0.08, 0.32)<br>p = 0.22                             | 0.09 (-0.14, 0.30)<br>p = 0.45                                                                         | 0.09 (-0.07, 0.25)<br>p = 0.26                      | 0.07 (-0.14, 0.27)<br>p = 0.50                                 | 0.03 (-0.19, 0.25)<br>p = 0.78                                                                         | 0.05 (-0.16, 0.25)<br>p = 0.65         | -0.08 (-0.28, 0.12)<br>p = 0.42                   | -0.02 (-0.24, 0.20)<br>p = 0.85                                                                        |
| Diary Rescue Albuterol Use        | -0.01 (-0.19, 0.16)<br>p = 0.87                 | -0.02 (-0.23, 0.18)<br>p = 0.83                            | -0.02 (-0.23, 0.18)<br>p = 0.83                                                                        | -0.09 (-0.25, 0.07)<br>p = 0.27                     | -0.10 (-0.30, 0.11)<br>p = 0.34                                | -0.10 (-0.30, 0.11)<br>p = 0.34                                                                        | -0.19 (-0.38, 0.01)<br>p = 0.06        | -0.06 (-0.26, 0.14)<br>p = 0.55                   | -0.06 (-0.27, 0.15)<br>p = 0.55                                                                        |
| ACQ Score                         | -0.27 (-0.43, -0.11)<br>p = 0.002               | 0.01 (-0.19, 0.21)<br>p = 0.92                             | -0.05 (-0.27, 0.87)<br>p = 0.68                                                                        | -0.21 (-0.37, -0.04)<br>p = 0.02                    | 0.03 (-0.17, 0.23)<br>p = 0.75                                 | 0.02 (-0.23, 0.19)<br>p = 0.84                                                                         | -0.19 (-0.38, 0.01)<br>p = 0.06        | -0.16 (-0.36, 0.04)<br>p = 0.12                   | -0.01 (-0.31, 0.13)<br>p = 0.40                                                                        |
| Prior Hospitalizations            | -0.23 (-0.39, -0.06)<br>p = 0.01                | -0.05 (-0.25, 0.16)<br>p = 0.64                            | -0.01 (-0.23, 0.21)<br>p = 0.93                                                                        | -0.30 (-0.44, -0.15)<br>p = 0.0001                  | -0.19 (-0.38, 0.01)<br>p = 0.06                                | -0.12 (-0.33, 0.11)<br>p = 0.30                                                                        | -0.09 (-0.29, 0.11)<br>p = 0.37        | 0.09 (-0.12, 0.29)<br>p = 0.41                    | 0.12 (-0.11, 0.33)<br>p = 0.30                                                                         |
| <b>Physiological Outcomes</b>     |                                                 |                                                            |                                                                                                        |                                                     |                                                                |                                                                                                        |                                        |                                                   |                                                                                                        |
| Diary AM PEF % Predicted          | <b>0.48 (0.34, 0.60)</b><br>p <.0001            | <b>0.49 (0.32, 0.63)</b><br>p <.0001                       | <b>0.46 (0.26, 0.61)</b><br>p <.0001                                                                   | 0.31 (0.15, 0.45)<br>p = 0.0002                     | 0.05 (-0.15, 0.25)<br>p = 0.62                                 | 0.06 (-0.16, 0.28)<br>p = 0.60                                                                         | 0.22 (0.02, 0.40)<br>p = 0.03          | -0.17 (-0.36, 0.03)<br>p = 0.10                   | -0.10 (-0.32, 0.13)<br>p = 0.39                                                                        |
| Diary PM PEF % Predicted          | 0.47 (0.32, 0.59)<br>p <.0001                   | 0.51 (0.34, 0.65)<br>p <.0001                              | 0.49 (0.30, 0.64)<br>p <.0001                                                                          | 0.28 (0.12, 0.43)<br>p = 0.001                      | 0.11 (-0.10, 0.31)<br>p = 0.29                                 | 0.10 (-0.13, 0.32)<br>p = 0.38                                                                         | 0.14 (-0.07, 0.33)<br>p = 0.18         | -0.28 (-0.46, -0.09)<br>p = 0.01                  | -0.23 (-0.43, -0.01)<br>p = 0.04                                                                       |
| Max BD                            | -0.17 (-0.33, 0.00)<br>p = 0.0001               | 0.19 (-0.02, 0.39)<br>p = 0.0001                           | 0.17 (-0.06, 0.40)<br>p = 0.0001                                                                       | <b>-0.67 (-0.75, -0.59)</b><br>p <.0001             | <b>-0.70 (-0.79, -0.61)</b><br>p <.0001                        | <b>-0.74 (-0.83, -0.65)</b><br>p <.0001                                                                | -0.32 (-0.49, -0.15)<br>p = 0.0001     | 0.16 (-0.04, 0.36)<br>p = 0.0001                  | 0.22 (-0.01, 0.45)<br>p = 0.0001                                                                       |

|                                                     |                                   |                                    |                                    |                                     |                                    |                                    |                                    |                                    |                                    |
|-----------------------------------------------------|-----------------------------------|------------------------------------|------------------------------------|-------------------------------------|------------------------------------|------------------------------------|------------------------------------|------------------------------------|------------------------------------|
| Response<br>(% Change in<br>FEV <sub>1</sub> )      | 0.01)<br>p = 0.06                 | 0.38)<br>p = 0.06                  | 0.38)<br>p = 0.14                  | <b>-0.58)</b><br>p <.0001           | <b>-0.58)</b><br>p <.0001          | <b>-0.62)</b><br>p <.0001          | -0.13)<br>p = 0.001                | 0.35)<br>p = 0.12                  | 0.42)<br>p = 0.06                  |
| log <sub>2</sub> (PC <sub>20</sub><br>methacholine) | 0.25 (0.06,<br>0.42)<br>p = 0.01  | -0.02 (-0.24,<br>0.21)<br>p = 0.88 | -0.01 (-0.24,<br>0.23)<br>p = 0.98 | 0.38 (0.20,<br>0.53)<br>p < .0001   | 0.25 (0.03,<br>0.45)<br>p = 0.02   | 0.24 (-0.01,<br>0.45)<br>p = 0.04  | 0.44 (0.24,<br>0.60)<br>p <.0001   | 0.21 (-0.01,<br>0.41)<br>p = 0.06  | 0.20 (-0.05,<br>0.41)<br>p = 0.10  |
| log <sub>10</sub> (FeNO)                            | 0.07 (-0.25,<br>0.10)<br>p = 0.41 | 0.10 (-0.11,<br>0.31)<br>p = 0.33  | 0.06 (-0.17,<br>0.29)<br>p = 0.61  | -0.20 (-0.36,<br>-0.04)<br>p = 0.01 | -0.10 (-0.30,<br>0.11)<br>p = 0.34 | -0.14 (-0.36,<br>0.10)<br>p = 0.25 | -0.19 (-0.38,<br>0.01)<br>p = 0.07 | -0.13 (-0.33,<br>0.08)<br>p = 0.21 | -0.04 (-0.27,<br>0.19)<br>p = 0.72 |

**eTable 4.** Pearson Correlation and Partial Correlation Coefficients (with 95% Confidence Intervals and P-values for Testing Null Correlations) of Spirometry Variables with Clinical Variables Using PACT Baseline Data

|                                   | FEV <sub>1</sub> %<br>Predicted<br>Correlations | FEV <sub>1</sub> %<br>Predicted<br>Partial<br>Correlations | FEV <sub>1</sub> %<br>Predicted<br>Partial<br>Correlations<br>(Partially<br>out Clinical<br>Variables) | FEF <sub>25-75</sub> %<br>Predicted<br>Correlations | FEV <sub>25-75</sub> %<br>Predicted<br>Partial<br>Correlations | FEV <sub>1</sub> %<br>Predicted<br>Partial<br>Correlations<br>(Partially<br>out Clinical<br>Variables) | FEV/FVC %<br>Predicted<br>Correlations | FEV/FVC %<br>Predicted<br>Partial<br>Correlations | FEV <sub>1</sub> %<br>Predicted<br>Partial<br>Correlations<br>(Partially<br>out Clinical<br>Variables) |
|-----------------------------------|-------------------------------------------------|------------------------------------------------------------|--------------------------------------------------------------------------------------------------------|-----------------------------------------------------|----------------------------------------------------------------|--------------------------------------------------------------------------------------------------------|----------------------------------------|---------------------------------------------------|--------------------------------------------------------------------------------------------------------|
| <b>Clinical Outcomes</b>          |                                                 |                                                            |                                                                                                        |                                                     |                                                                |                                                                                                        |                                        |                                                   |                                                                                                        |
| Diary Symptoms (Cough and Wheeze) | -0.02 (-0.15, 0.10)<br>p = 0.7140               | 0.00 (-0.14, 0.14)<br>p = 0.97                             | 0.01 (-0.14, 0.16)<br>p = 0.86                                                                         | -0.05 (-0.17, 0.07)<br>p = 0.44                     | -0.05 (-0.19, 0.09)<br>p = 0.50                                | -0.08 (-0.23, 0.07)<br>p = 0.28                                                                        | -0.06 (-0.20, 0.08)<br>p = 0.43        | 0.03 (-0.11, 0.17)<br>p = 0.66                    | 0.09 (-0.06, 0.24)<br>p = 0.25                                                                         |
| Diary Rescue Albuterol Use        | -0.14 (-0.26, -0.02)<br>p = 0.0218              | -0.07 (-0.21, 0.07)<br>p = 0.35                            | -0.09 (-0.24, 0.06)<br>p = 0.25                                                                        | -0.16 (-0.28, -0.04)<br>p = 0.01                    | -0.03 (-0.17, 0.11)<br>p = 0.71                                | 0.01 (-0.14, 0.16)<br>p = 0.89                                                                         | -0.23 (-0.36, -0.09)<br>p = 0.001      | -0.04 (-0.18, 0.10)<br>p = 0.54                   | -0.06 (-0.21, 0.02)<br>p = 0.41                                                                        |
| ACQ Score                         | -0.20 (-0.32, -0.08)<br>p = 0.0012              | -0.17 (-0.30, -0.03)<br>p = 0.02                           | -0.15 (-0.29, 0.00)<br>p = 0.05                                                                        | -0.15 (-0.27, -0.03)<br>p = 0.02                    | 0.11 (-0.03, 0.24)<br>p = 0.14                                 | 0.06 (-0.09, 0.21)<br>p = 0.44                                                                         | -0.24 (-0.37, -0.11)<br>p = 0.001      | -0.16 (-0.30, -0.02)<br>p = 0.02                  | -0.11 (-0.26, 0.04)<br>p = 0.14                                                                        |
| Prior Hospitalizations            | -0.04 (-0.16, 0.08)<br>p = 0.5215               | 0.07 (-0.07, 0.21)<br>p = 0.35                             | 0.05 (-0.11, 0.20)<br>p = 0.55                                                                         | -0.03 (-0.16, 0.09)<br>p = 0.58                     | -0.08 (-0.22, 0.06)<br>p = 0.25                                | -0.06 (-0.21, 0.10)<br>p = 0.47                                                                        | 0.02 (-0.12, 0.16)<br>p = 0.78         | 0.08 (-0.06, 0.22)<br>p = 0.28                    | 0.04 (-0.11, 0.19)<br>p = 0.60                                                                         |
| <b>Physiological Outcomes</b>     |                                                 |                                                            |                                                                                                        |                                                     |                                                                |                                                                                                        |                                        |                                                   |                                                                                                        |
| Diary AM PEF % Predicted          | 0.33 (0.21, 0.43)<br>p < .0001                  | 0.26 (0.12, 0.39)<br>p = .0002                             | 0.28 (0.14, 0.42)<br>p = 0.0002                                                                        | 0.26 (0.15, 0.37)<br>p < .0001                      | -0.12 (-0.26, 0.02)<br>p = 0.09                                | -0.13 (-0.27, 0.02)<br>p = 0.09                                                                        | 0.32 (0.19, 0.44)<br>p < .0001         | 0.18 (-0.04, 0.31)<br>p = 0.01                    | 0.16 (0.01, 0.30)<br>p = 0.05                                                                          |
| Diary PM PEF % Predicted          | 0.30 (0.18, 0.41)<br>p < .0001                  | 0.26 (0.12, 0.38)<br>p = .0002                             | 0.28 (0.13, 0.41)<br>p = 0.0002                                                                        | 0.22 (0.10, 0.33)<br>p = 0.001                      | -0.14 (-0.28, -0.00)<br>p = 0.04                               | -0.14 (-0.28, 0.01)<br>p = 0.07                                                                        | 0.27 (0.14, 0.40)<br>p = 0.0001        | 0.18 (0.04, -0.32)<br>p = 0.01                    | 0.15 (0.00, -0.29)<br>p = 0.05                                                                         |
| Max BD Response (% Change in      | -0.46 (-0.56, -0.36)                            | 0.13 (-0.00, 0.27)                                         | 0.11 (-0.04, 0.26)                                                                                     | <b>-0.46 (-0.56, -0.36)</b>                         | -0.23 (-0.36, -0.09)                                           | -0.16 (-0.30, -0.01)                                                                                   | -0.42 (-0.53, -0.30)                   | 0.01 (-0.13, 0.15)                                | -0.06 (-0.21, 0.09)                                                                                    |

|                                                  |                                    |                                |                                |                                    |                                 |                                 |                                  |                                 |                                 |
|--------------------------------------------------|------------------------------------|--------------------------------|--------------------------------|------------------------------------|---------------------------------|---------------------------------|----------------------------------|---------------------------------|---------------------------------|
| FEV <sub>1</sub> )                               | p <.0001                           | p = 0.05                       | p = 0.14                       | p <.0001                           | p = 0.001                       | p = 0.04                        | p <.0001                         | p = 0.90                        | p = 0.42                        |
| log <sub>2</sub> (PC <sub>20</sub> methacholine) | 0.35 (0.23, 0.46)<br>p <.0001      | 0.12 (-0.03, 0.27)<br>p = 0.10 | 0.12 (-0.03, 0.22)<br>p = 0.13 | 0.35 (0.23, 0.46)<br>p <.0001      | 0.06 (-0.09, 0.21)<br>p = 0.40  | 0.05 (-0.10, 0.20)<br>p = 0.51  | 0.40 (0.26, 0.52)<br>p <.0001    | 0.06 (-0.09, 0.21)<br>p = 0.42  | 0.06 (-0.10, 0.21)<br>p = 0.47  |
| log <sub>10</sub> (FeNO)                         | -0.23 (-0.35, -0.11)<br>p = 0.0002 | 0.02 (-0.12, 0.16)<br>p = 0.79 | 0.04 (-0.11, 0.19)<br>p = 0.57 | -0.23 (-0.35, -0.11)<br>p = 0.0002 | -0.07 (-0.21, 0.07)<br>p = 0.32 | -0.01 (-0.16, 0.14)<br>p = 0.86 | -0.27 (-0.40, -0.14)<br>p <.0001 | -0.05 (-0.19, 0.09)<br>p = 0.49 | -0.09 (-0.24, 0.06)<br>p = 0.22 |

eTable 5. Canonical Correlation Analysis Between Spirometry Variables and Clinical Variables Using CLIC Baseline Data

| <b>CLIC Canonical Variate Pairs</b>                |                       |                       |                       |
|----------------------------------------------------|-----------------------|-----------------------|-----------------------|
| <b>Standardized Coefficients</b>                   |                       |                       |                       |
|                                                    | <b>Variate Pair 1</b> | <b>Variate Pair 2</b> | <b>Variate Pair 3</b> |
| Diary AM PEF<br>% Predicted                        | 0.15                  | 1.19                  | 0.99                  |
| Diary PM PEF<br>% Predicted                        | 0.12                  | -0.71                 | -1.75                 |
| Max BD Response<br>(% Change in FEV <sub>1</sub> ) | -0.90                 | 0.50                  | -0.04                 |
| log <sub>2</sub> (PC <sub>20</sub> )               | 0.30                  | 0.51                  | 0.56                  |
| Diary Symptoms<br>(Cough and Wheeze)               | 0.06                  | 0.26                  | -0.08                 |
| Diary Rescue<br>Albuterol Use                      | 0.25                  | -0.13                 | 0.08                  |
| log <sub>10</sub> (Exhaled NO)                     | 0.06                  | 0.15                  | 0.06                  |
| ACQ Score                                          | -0.07                 | -0.13                 | 0.34                  |
| Prior Hospitalizations                             | -0.03                 | 0.28                  | 0.34                  |

|                                   |                    |                   |                  |
|-----------------------------------|--------------------|-------------------|------------------|
|                                   |                    |                   |                  |
| FEV <sub>1</sub> % Predicted      | 0.05               | 0.68              | -1.11            |
| FEF <sub>25-75</sub> % Predicted  | 1.07               | -0.67             | -0.05            |
| FEV <sub>1</sub> /FVC % Predicted | -0.17              | 0.71              | 1.19             |
|                                   |                    |                   |                  |
| <b>Canonical Correlation</b>      | 0.84<br>p < 0.0001 | 0.53<br>p = 0.002 | 0.50<br>p = 0.01 |

eTable 6. Canonical Correlation Analysis Between Spirometry Variables and Clinical Variables Using PACT Baseline Data

| <b>PACT Canonical Variate Pairs</b>                |                       |                       |                       |
|----------------------------------------------------|-----------------------|-----------------------|-----------------------|
| <b>Standardized Coefficients</b>                   |                       |                       |                       |
|                                                    | <b>Variate Pair 1</b> | <b>Variate Pair 2</b> | <b>Variate Pair 3</b> |
| Diary AM PEF<br>% Predicted                        | 0.64                  | 0.26                  | 0.29                  |
| Diary PM PEF<br>% Predicted                        | -0.15                 | 0.39                  | -0.42                 |
| Max BD Response<br>(% Change in FEV <sub>1</sub> ) | -0.37                 | 0.82                  | -0.03                 |
| log <sub>2</sub> (PC <sub>20</sub> )               | 0.39                  | 0.07                  | 0.53                  |
| Diary Symptoms<br>(Cough and Wheeze)               | 0.17                  | 0.29                  | -0.86                 |
| Diary Rescue<br>Albuterol Use                      | -0.10                 | 0.03                  | 0.05                  |
| log <sub>10</sub> (Exhaled NO)                     | -0.02                 | 0.20                  | 0.62                  |
| ACQ Score                                          | -0.32                 | -0.38                 | 0.41                  |
| Prior Hospitalizations                             | 0.10                  | -0.05                 | -0.17                 |



|                                   |                    |                  |                  |
|-----------------------------------|--------------------|------------------|------------------|
|                                   |                    |                  |                  |
| FEV <sub>1</sub> % Predicted      | 0.56               | 1.64             | -0.27            |
| FEF <sub>25-75</sub> % Predicted  | -0.12              | -2.08            | 2.44             |
| FEV <sub>1</sub> /FVC % Predicted | 0.70               | 0.60             | -2.28            |
|                                   |                    |                  |                  |
| <b>Canonical Correlation</b>      | 0.61<br>p < 0.0001 | 0.36<br>p = 0.03 | 0.20<br>p = 0.47 |
|                                   |                    |                  |                  |

**eFigure 1.** Receiver Operator Characteristic (ROC) curves of  $FEF_{25-75}$  % predicted for bronchodilator responsiveness (BD) as 20% change in  $FEV_1$  (a) and ROC curve of  $FEV_1/FVC$  % predicted for BD responsiveness as 20% change in  $FEV_1$  (b). The inflection value for  $FEF_{25-75}$  is at 36% predicted and that for the  $FEV_1/FVC$  is at 79% predicted. (CLIC alone)

(a)

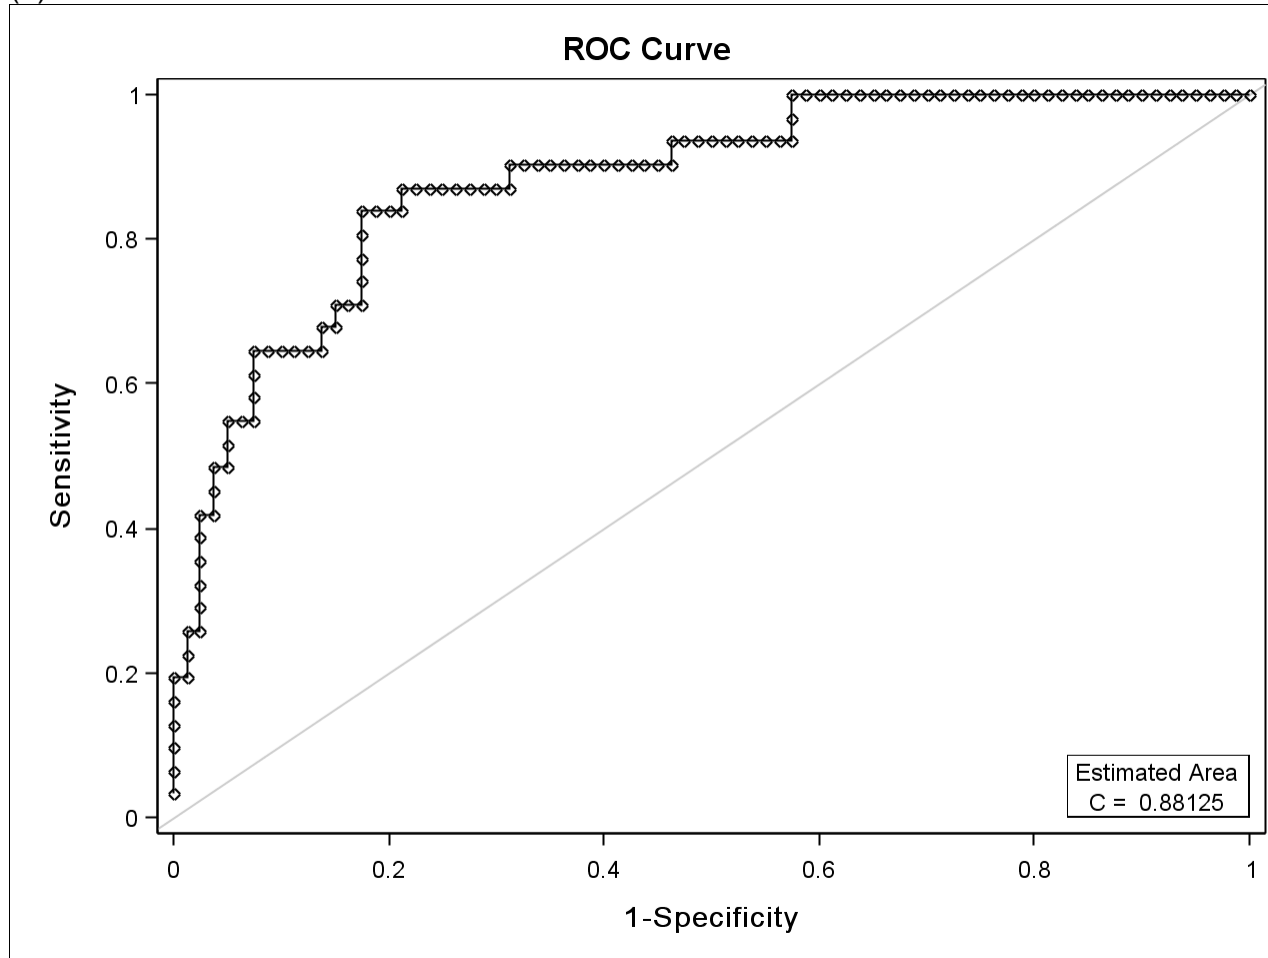

(b)

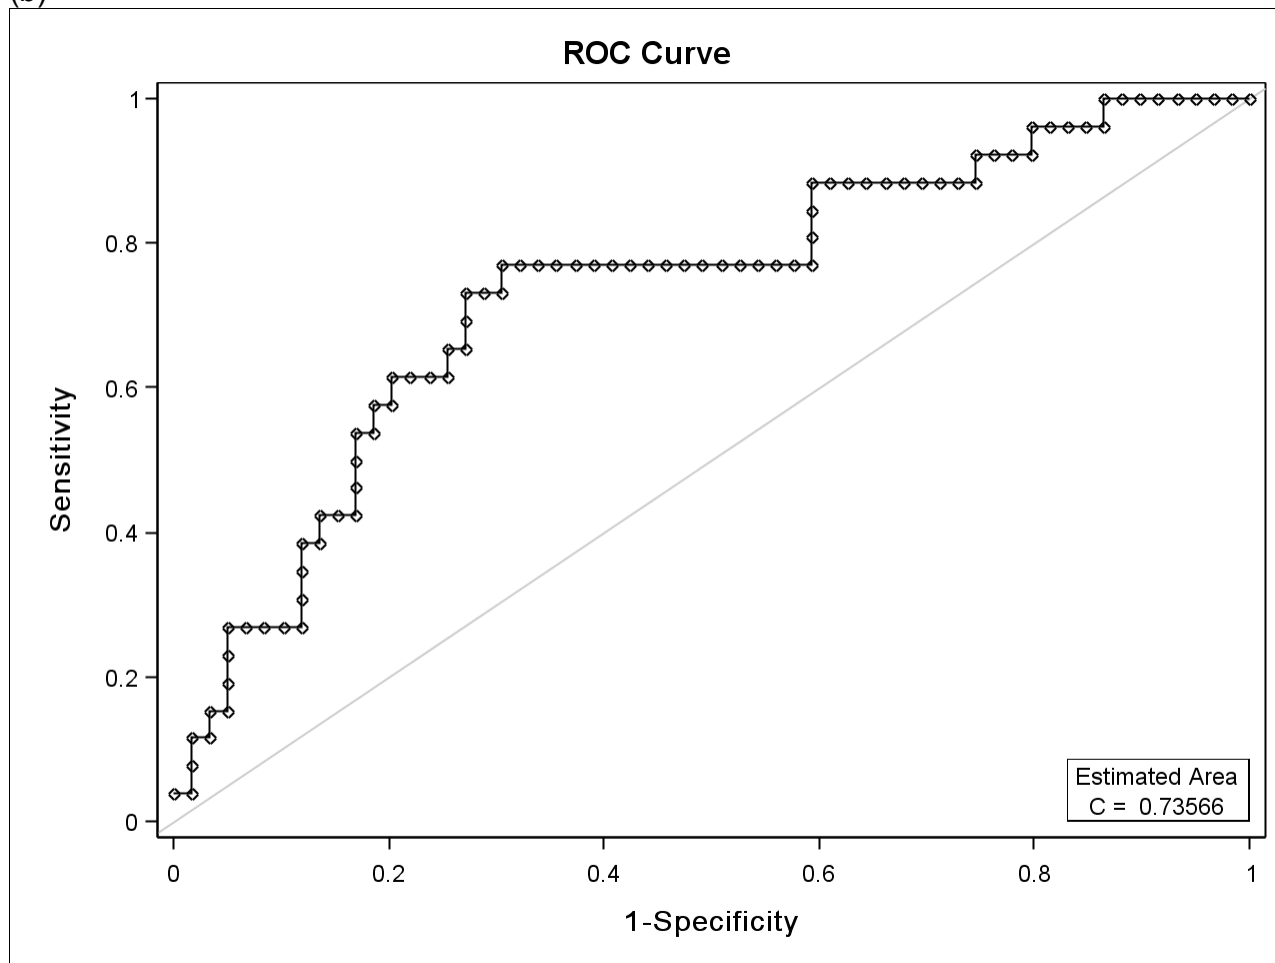

eFigure 2. Receiver Operator Characteristic (ROC) curves of  $FEF_{25-75}$  % predicted for bronchodilator responsiveness (BD) as 20% change in  $FEV_1$  (a) and ROC curve of  $FEV_1/FVC$  % predicted for BD responsiveness as 20% change in  $FEV_1$  (b). The inflection value for  $FEF_{25-75}$  is at 50% predicted, while that for the  $FEV_1/FVC$  cannot be determined. (PACT alone)

(a)

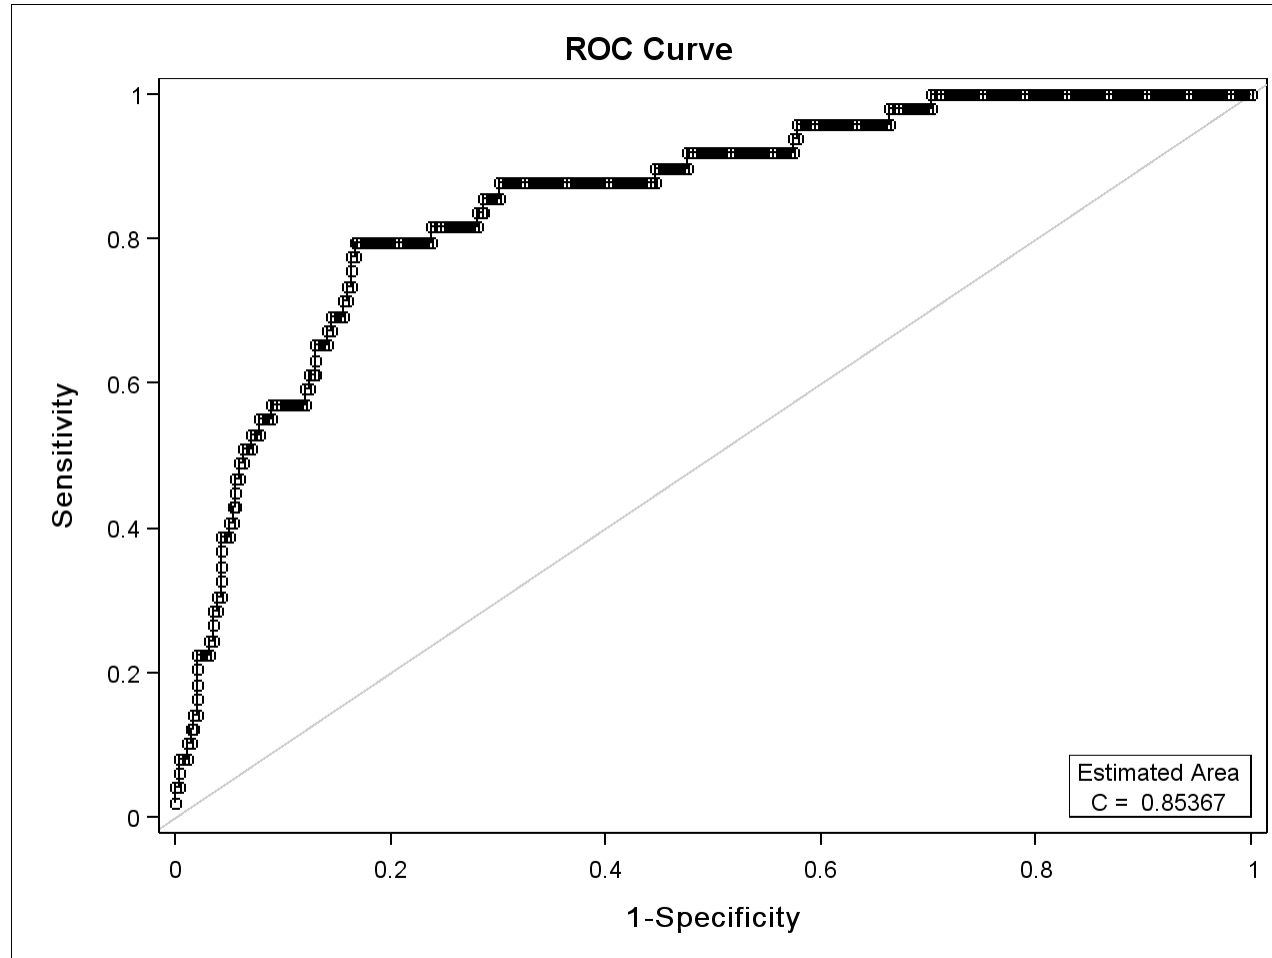

(b)

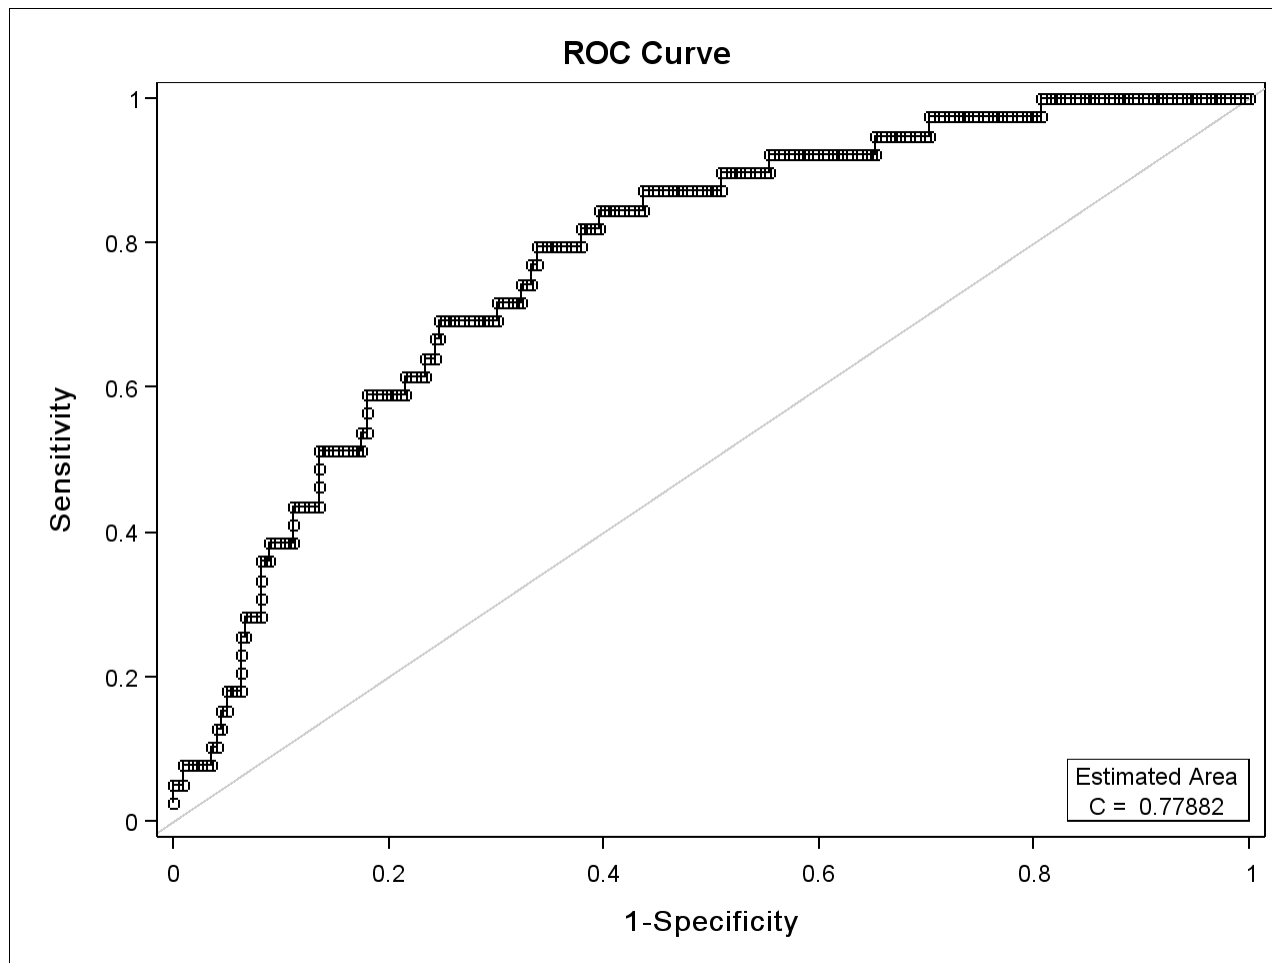

eFigure 1. Receiver Operator Characteristic (ROC) curves of  $FEF_{25-75}$  % predicted for bronchodilator responsiveness (BD) as 20% change in  $FEV_1$  (a) and ROC curve of  $FEV_1/FVC$  % predicted for BD responsiveness as 20% change in  $FEV_1$  (b). The inflection value for  $FEF_{25-75}$  is at 36% predicted and that for the  $FEV_1/FVC$  is at 79% predicted. (CLIC alone)

(a)

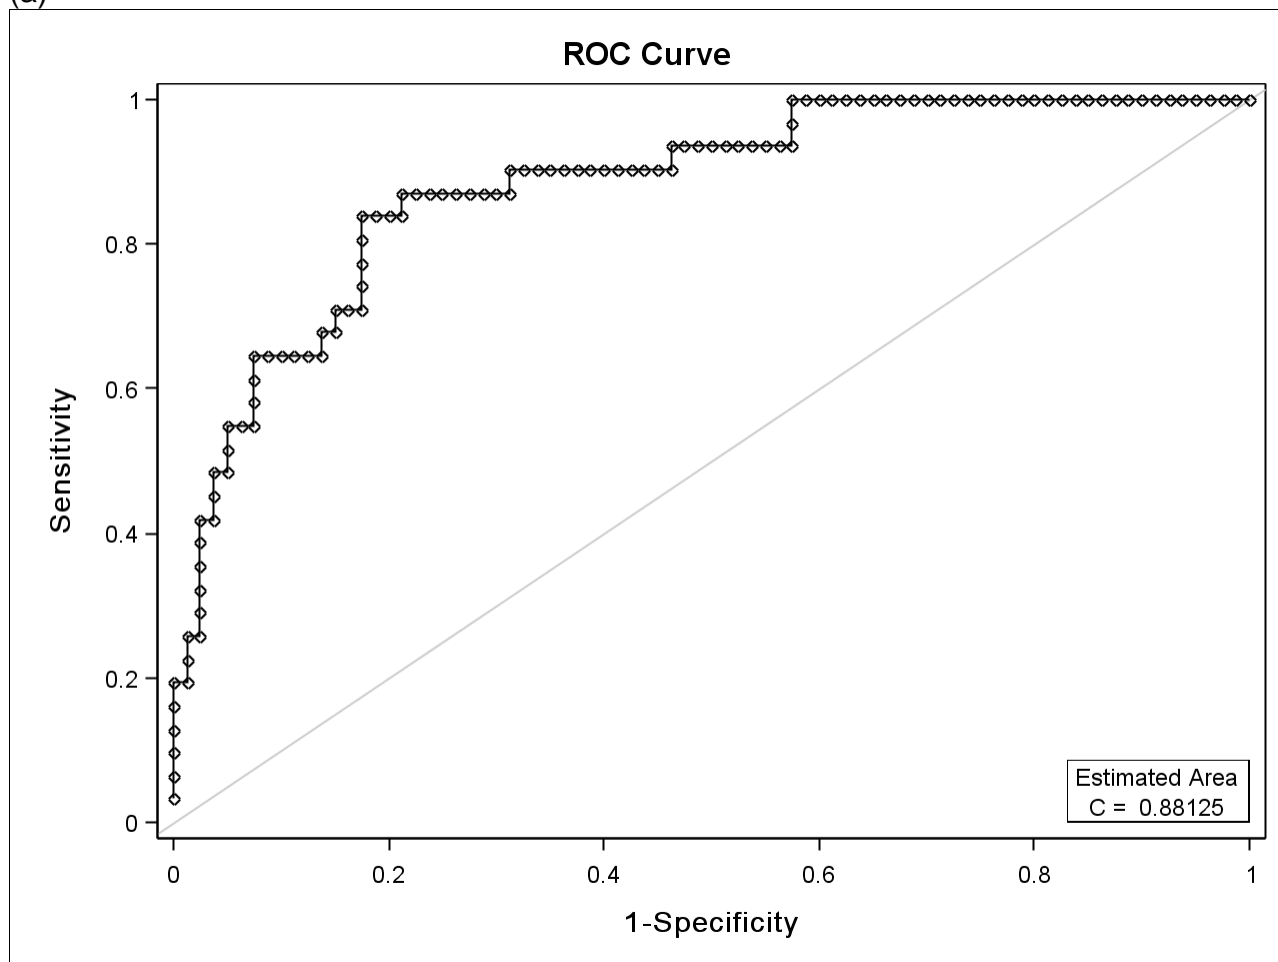

(b)

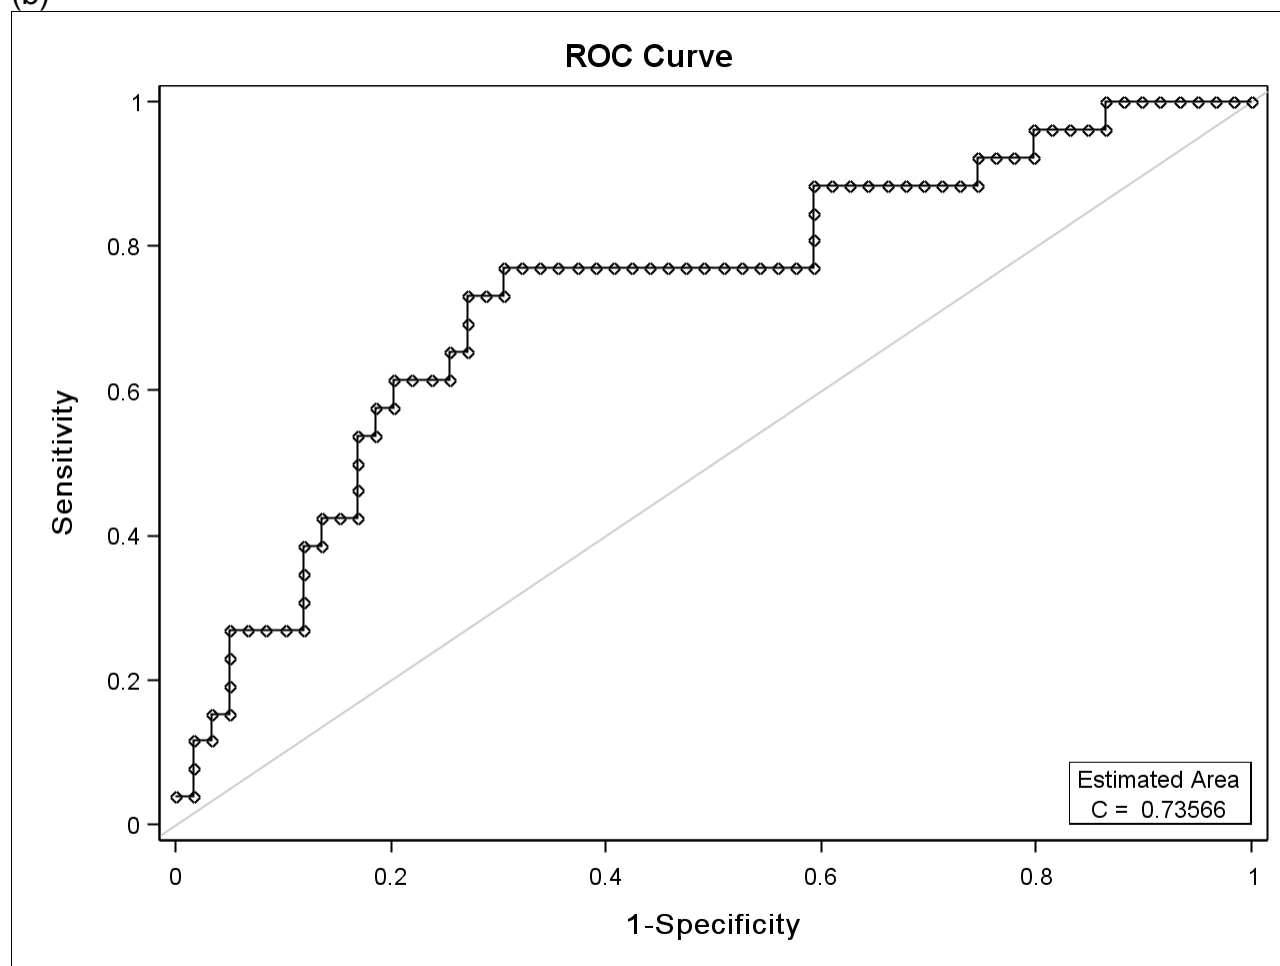

eFigure 2. Receiver Operator Characteristic (ROC) curves of  $FEF_{25-75}$  % predicted for bronchodilator responsiveness (BD) as 20% change in  $FEV_1$  (a) and ROC curve of  $FEV_1/FVC$  % predicted for BD responsiveness as 20% change in  $FEV_1$  (b). The inflection value for  $FEF_{25-75}$  is at 50% predicted, while that for the  $FEV_1/FVC$  cannot be determined. (PACT alone)

(a)

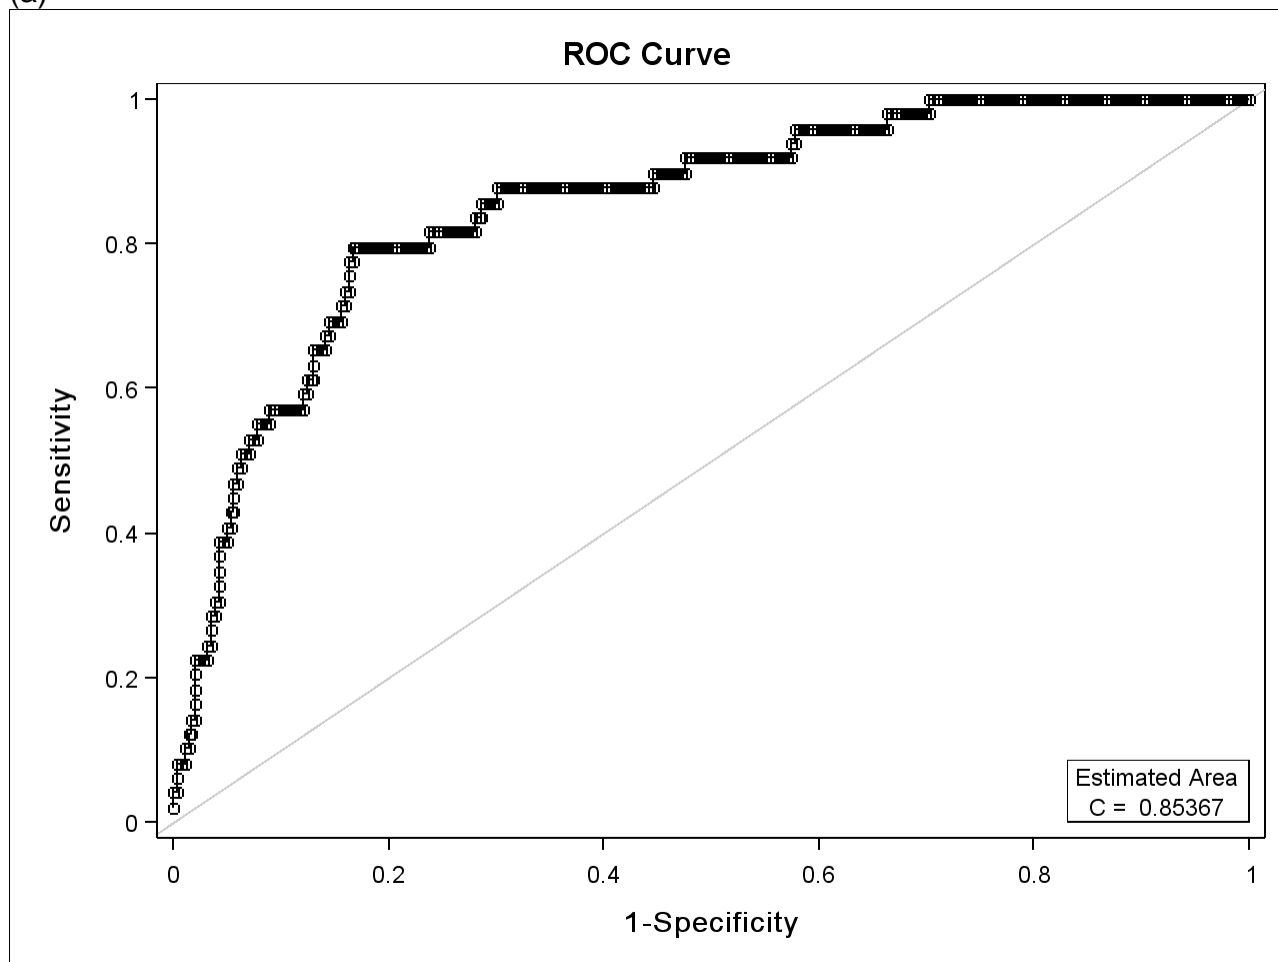



(b)

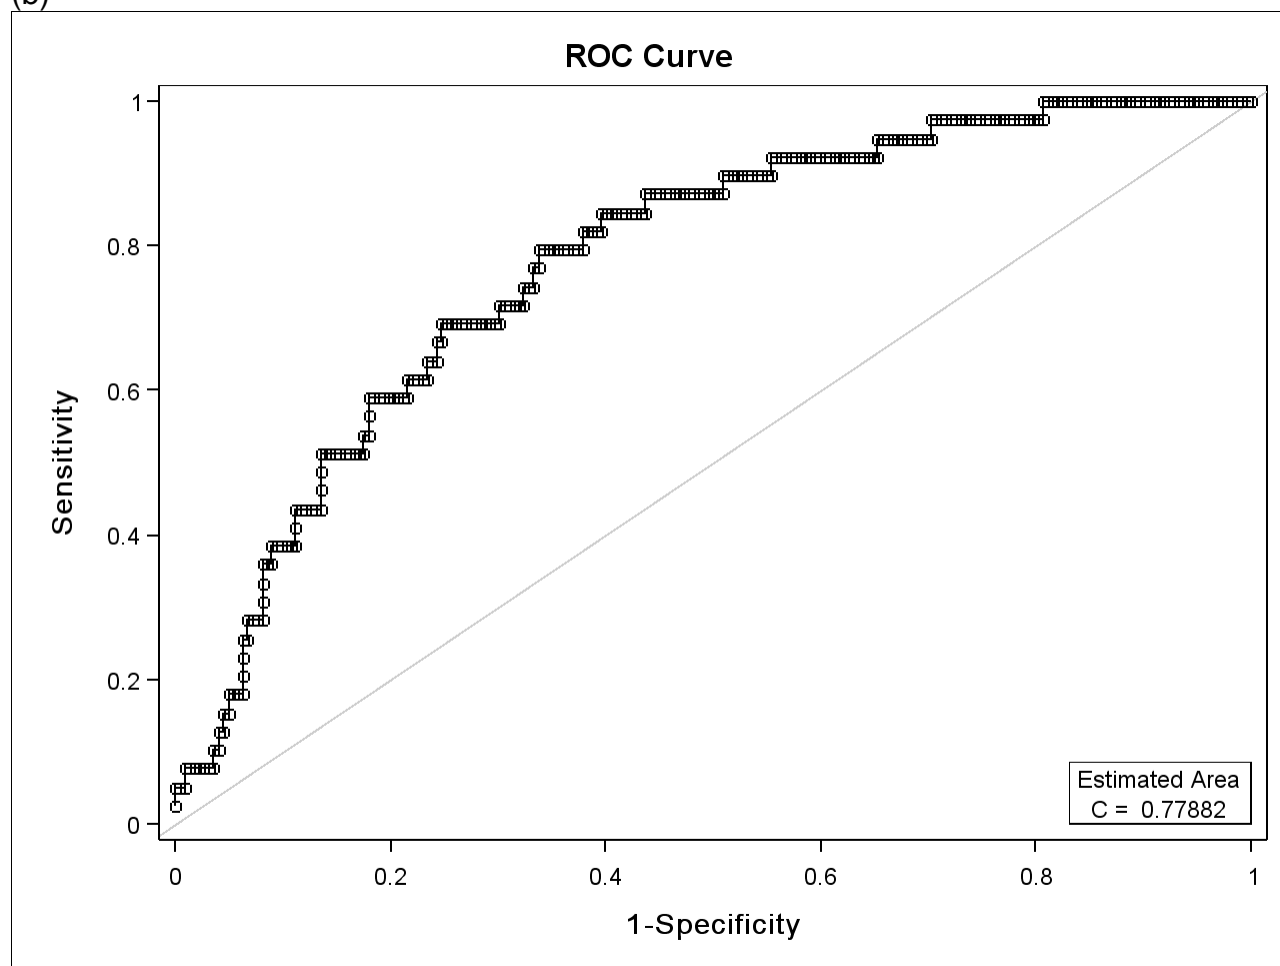

Supplement: NIHMS223675-supplement-supplement_1.pdf [file NIHMS223675-supplement-supplement_1.pdf]
